# Supplementary material for: Heme Oxygenase-1 Expression in Dendritic Cells Contributes to Protective Immunity against Herpes Simplex Virus Skin Infection
Source: MDPI journal article supplement (doi:10.3390/antiox12061170), 2023-05-29
Supplement: s1 [file s1]

SUPPLEMENTARY MATERIAL

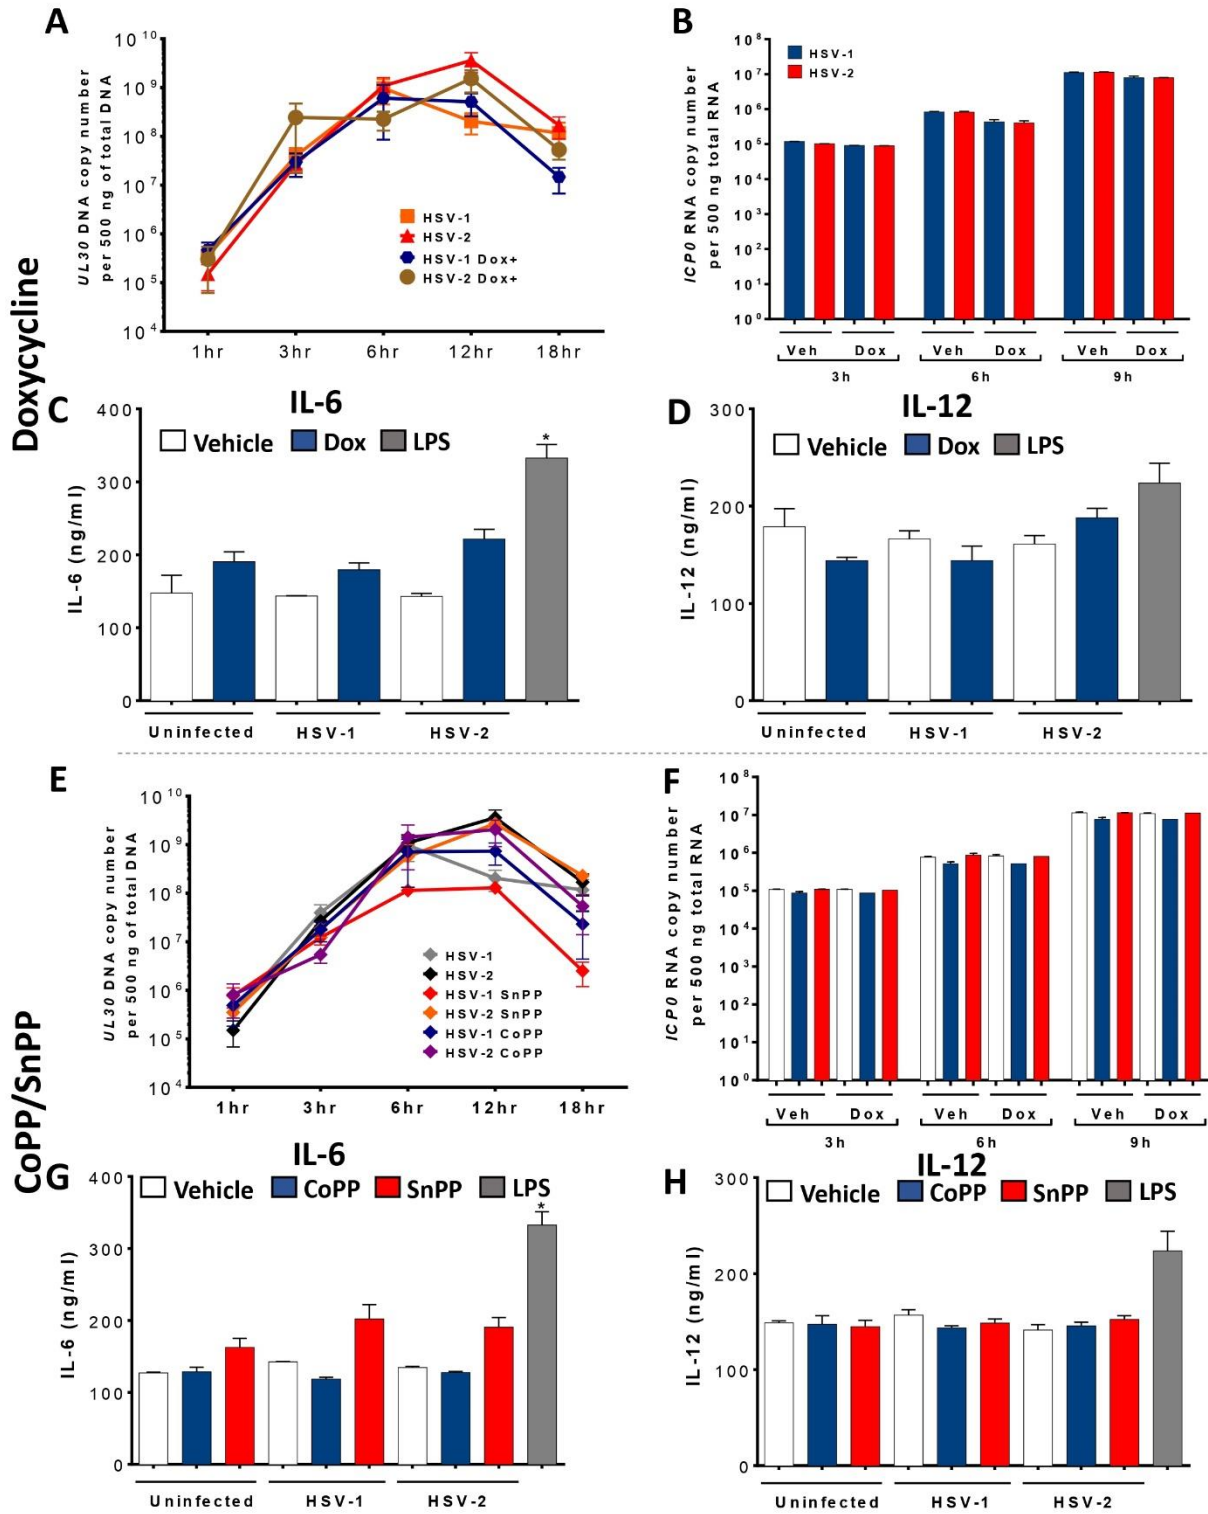

**Supplementary Figure S1.** HO-1 induction in infected DCs by HSV-1 or HSV-2 does not affect viral replication or transcription. (A) Copy number of HSV-1 or HSV-2 UL30 (qPCR) in total DNA obtained from Dox-treated DCs and infected HSV-1 or HSV-2 at timepoints 3, 6, 9, 12 and 18 hpi. (B) Copy number of HSV-1 or HSV-2 *ICP0* (RT-qPCR) measured in Dox-treated DCs after 6 h of HSV-1 or HSV-2 infection. (C) IL-6 secretion in Dox-treated HSV-infected DCs at 24 hpi. (D) IL-12 secretion in Dox-treated HSV-infected DCs at 24 hpi. (E) Copy number of HSV-1 or HSV-2 UL30 (qPCR) in total DNA obtained from CoPP- or SnPP-treated DCs and infected HSV-1 or HSV-2 at timepoints 3, 6, 9, 12 and 18 hpi. (F) Copy number of HSV-1 or HSV-2 *ICP0* (RT-qPCR) measured in CoPP- or SnPP-treated DCs after 6 h of HSV-1 or HSV-2 infection. (G) IL-6 secretion in CoPP- or SnPP-treated HSV-infected DCs at 24 hpi. (H) IL-12 secretion in CoPP- or SnPP-treated HSV-infected DCs at 24 hpi. LPS: lipopolysaccharides. Statistical analysis: Kruskal–Wallis and Dunnett's multiple comparison (\* $p < 0.05$ ).

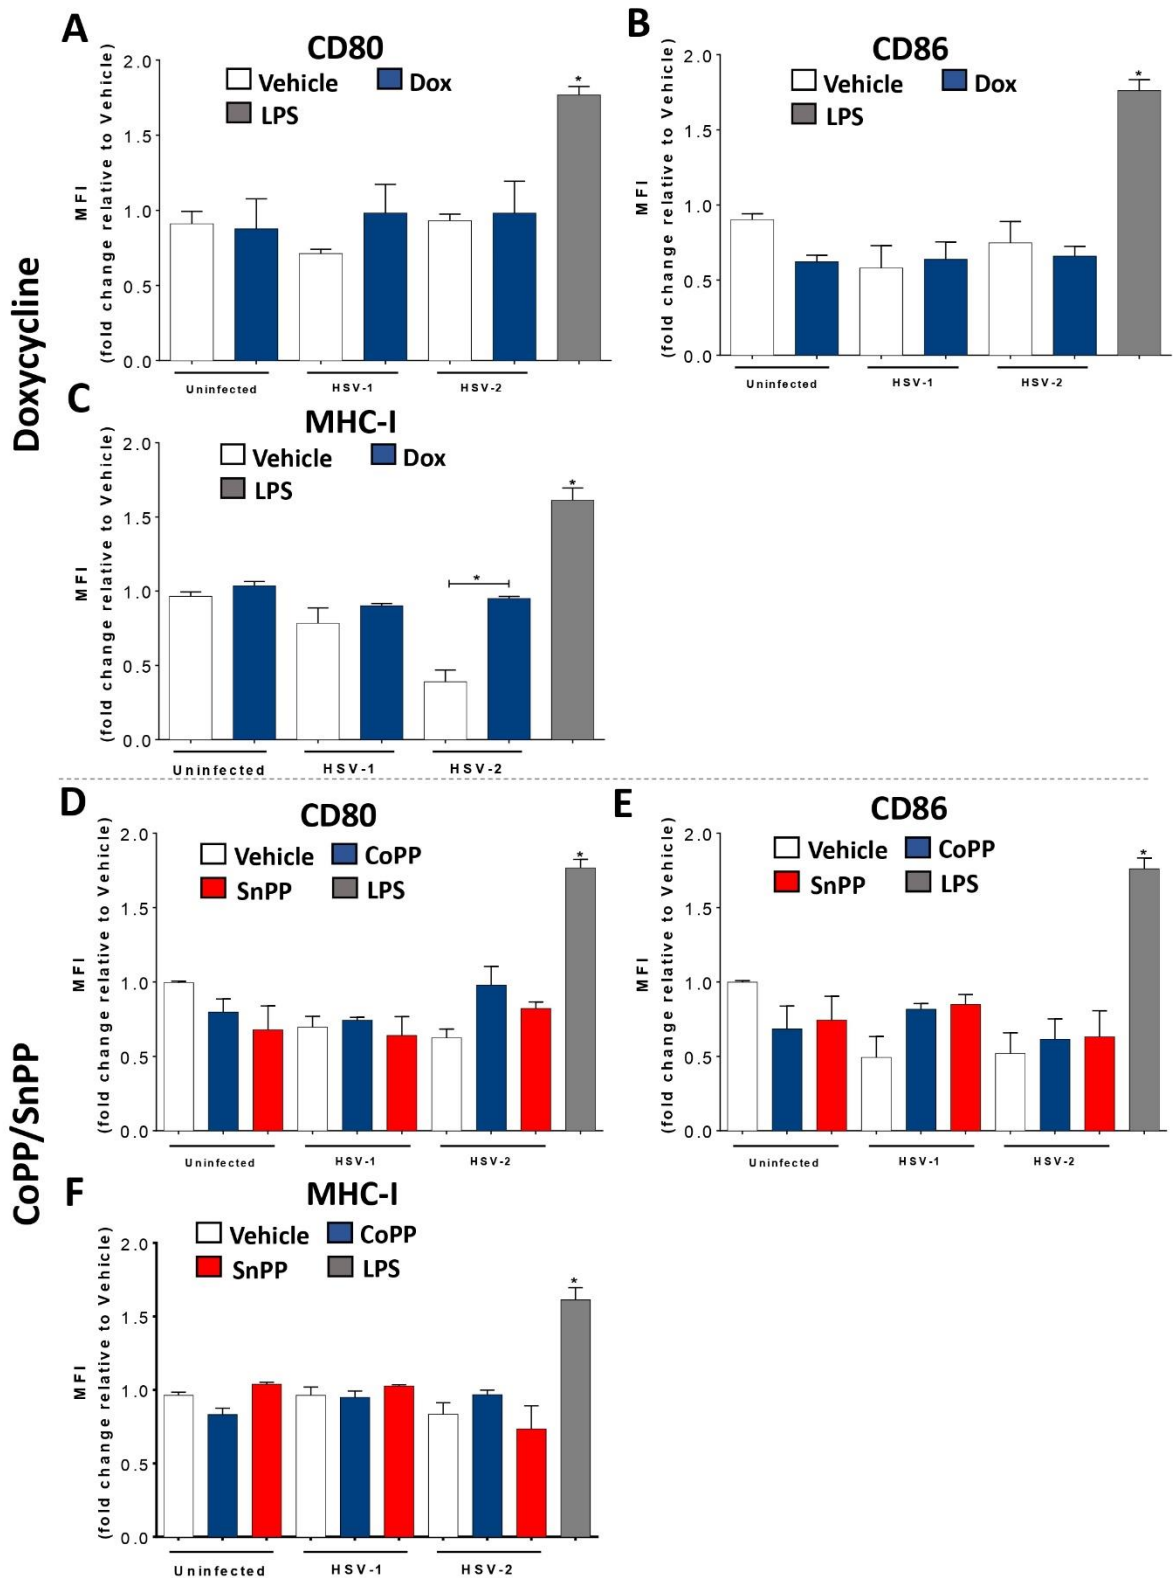

**Supplementary Figure S2.** HO-1 does not promote significant maturation in HSV-infected DCs. (A) Surface expression of CD80 in DCs measured by FACS (over CD11c<sup>+</sup>, MHC-II<sup>+</sup> (I-Ab<sup>+</sup>), Zombie<sup>-</sup>) at 24 hpi with HSV-1 or HSV-2 after 16 h treatment

with doxycycline (Dox, 1.5 µg/ml). (B) Surface expression of CD86 in DCs. (C) Surface expression of MHC-I (H-2K<sup>b</sup>) in DCs. (D) Surface expression of CD80 in DCs as measured by FACS (over CD11c<sup>+</sup>, MHC-II (I-Ab<sup>+</sup>), Zombie<sup>-</sup>) at 24 hpi with HSV-1 or HSV-2 after treatment with CoPP or SnPP (50 µM). (E) Surface expression of CD86 in DCs. (F) Surface expression of MHC-I (H-2K<sup>b</sup>) in DCs. LPS: lipopolysaccharides. Statistical analysis: Kruskal–Wallis and Dunnett's multiple comparison (\*p <0.05; \*\*\*p <0.001).

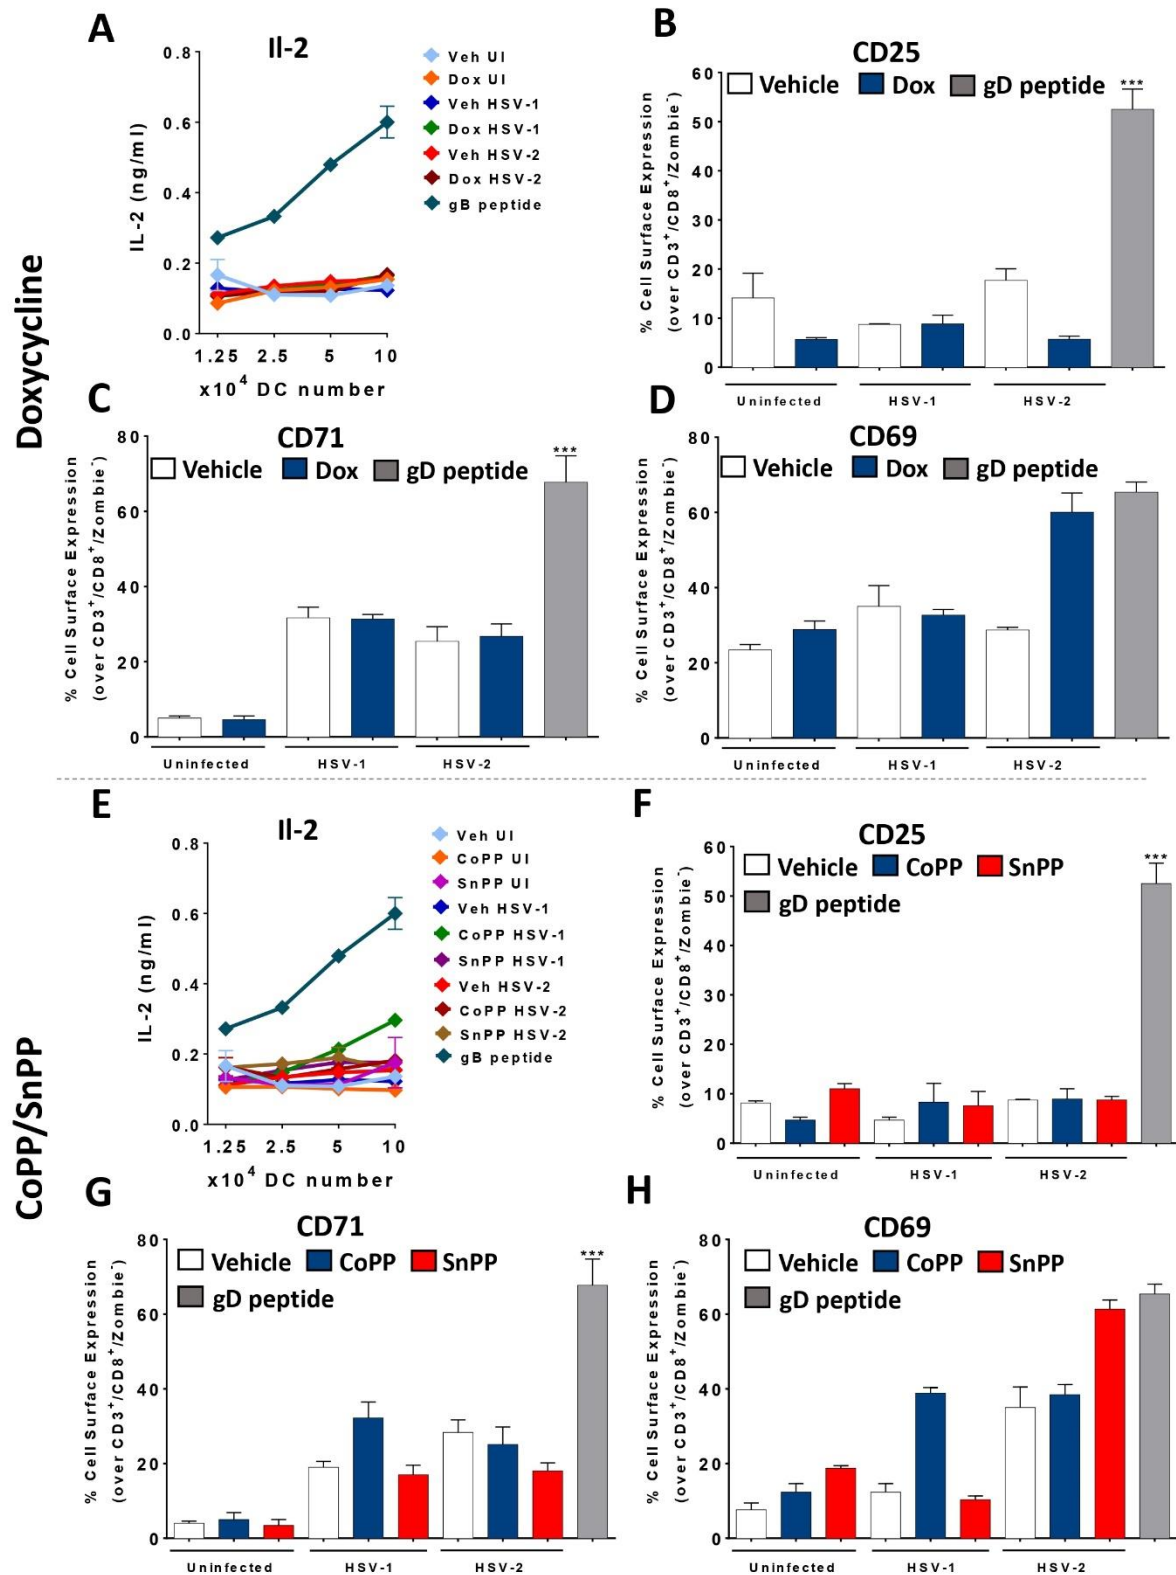

**Supplementary Figure S3.** HO-1 expression in HSV-infected DCs does not promote CD8<sup>+</sup> T cell activation *in vitro*. (A) Secretion levels of IL-2 in supernatants from co-cultures between CD8<sup>+</sup> T and HSV-infected and treated DCs as measured by ELISA

at 48 hpi with HSV-1 or HSV-2 after 6 h treatment with CoPP or SnPP (50  $\mu$ M). (B) Surface expression of CD25 in CD8 T cells stimulated by DCs, measured by FACS (over CD3<sup>+</sup>, CD8<sup>+</sup>, Zombie<sup>-</sup>) with its respective treatment conditions. (C) Surface expression of CD71 in CD8 T cells (Dox). (D) Surface expression of CD69 in CD8 T cells (Dox). (E) Secretion levels of IL-2 in supernatants from CD4 T cells co-cultured with DCs after 6 h treatment with CoPP or SnPP (50  $\mu$ M). (F) Surface expression of CD25 in CD8 T cells co-cultured with DCs after 6 h treatment with CoPP or SnPP (50  $\mu$ M). (G) Surface expression of CD71 in CD8 T cells co-cultured with DCs after 6 h treatment with CoPP or SnPP (50  $\mu$ M). (H) Surface expression of CD69 in CD8 T co-cultured with DCs after 6 h treatment with CoPP or SnPP (50  $\mu$ M). Statistical analysis: Kruskal–Wallis and Dunnett's multiple comparison (\* $p$  < 0.05, \*\*\* $p$  < 0.001).

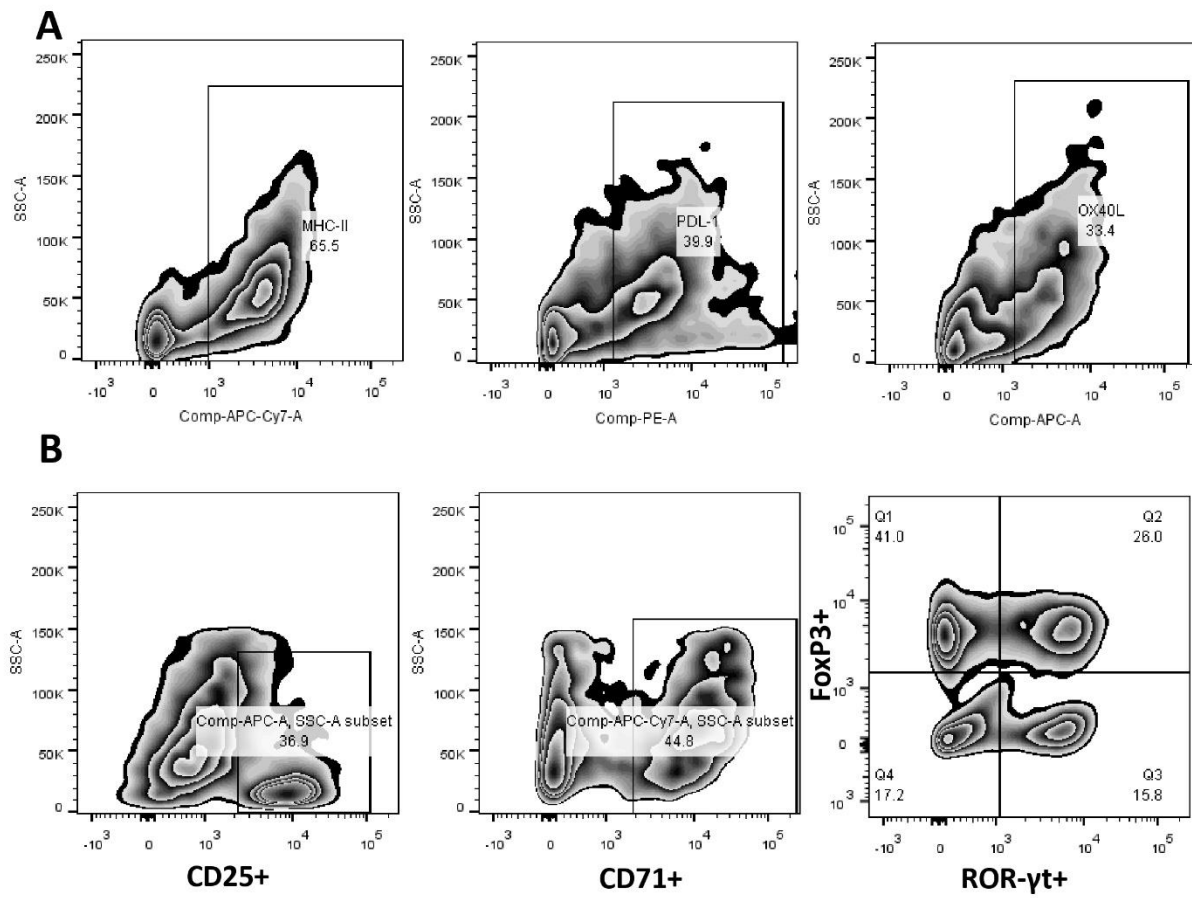

**Supplementary Figure S4.** HO-1 expression in HSV-infected DCs upregulates FoxP3 expression in CD4<sup>+</sup> T cell *in vitro*. (A) Representative zebra blots of surface markers in DCs analyzed by FACS. (B) Representative zebra blots of surface, and intracellular markers in CD4<sup>+</sup> T cells analyzed by FACS.

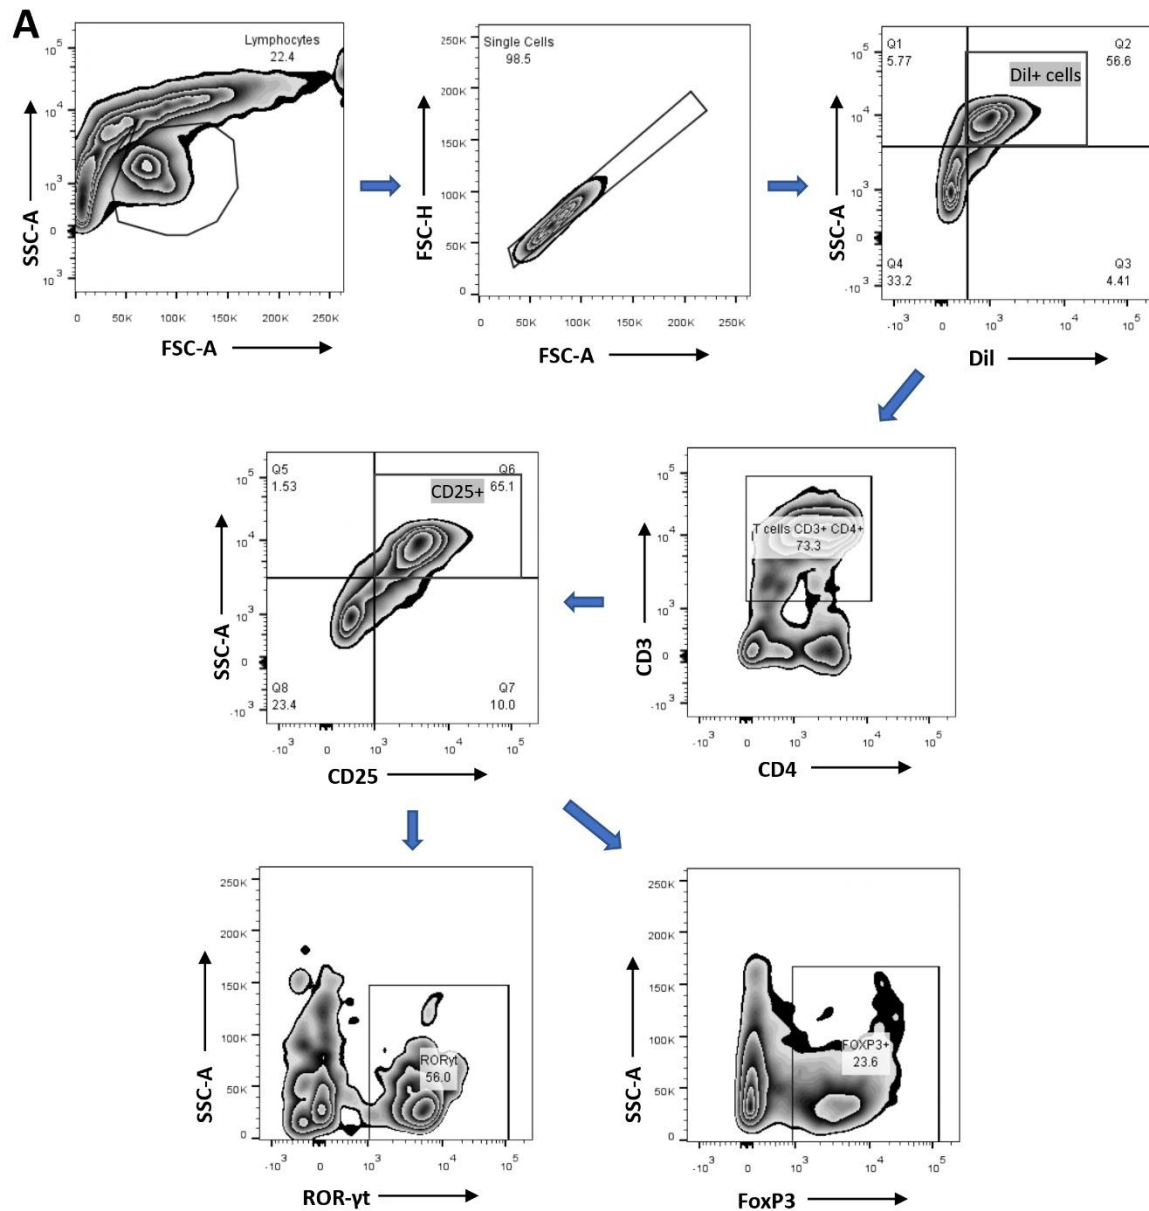

**Supplementary Figure S5.** Gating strategy to determine the populations of virus-specific CD4<sup>+</sup> T cells in tissues recovered after HSV-1 skin infection in mice transferred with HO-1-expressing and HSV-infected DCs *in vitro*.



**Supplementary Table S1.** Clinical score and disease symptom incidence in HSV-1 skin-infected mice transferred with HO-1-expressing and HSV-infected DCs.

| Group      | Incidence of HSV-derived Symptoms* | Mean Day of Disease Onset | Maximum Clinical Score | Mean Clinical Score at Day 4 | Mean Clinical Score at Day 10 |
|------------|------------------------------------|---------------------------|------------------------|------------------------------|-------------------------------|
| UI         | 0% (0/9)                           | 0                         | 1                      | 0.55                         | 0                             |
| UI CoPP    | 0% (0/9)                           | 0                         | 1                      | 0.66                         | 0                             |
| HSV-1 KOS  | 100% (9/9)                         | 3                         | 4                      | 2.11                         | 2.14                          |
| HSV-1 CoPP | 33.3% (3/9)                        | 4                         | 2                      | 1.22                         | 0.28                          |
| HSV-1 SnPP | 77.7% (7/9)                        | 3                         | 3                      | 2.11                         | 1.28                          |

\* Scores from 2 and above relate to disease elicited by skin HSV infection.
